# Supplementary material for: Rational design and characterization of heteroleptic phosphorescent iridium(iii) complexes for highly efficient deep-blue OLEDs
Source: Royal Society of Chemistry journal article supplement (doi:10.1039/c6tc04119a), 2016-01-01
Supplement: c6tc04119a1.pdf [file c6tc04119a1.pdf]

## Supporting Information

# Rational Design and Characterization of Heteroleptic Phosphorescent Iridium(III) Complexes for Highly Efficient Deep-Blue OLEDs

Yansong Feng,<sup>a</sup> Xuming Zhuang,<sup>a</sup> Dongxia Zhu,<sup>b</sup> Yu Liu,<sup>\*a</sup> Yue Wang,<sup>a</sup> and Martin R. Bryce<sup>\*c</sup>

<sup>a</sup>State Key Laboratory of Supramolecular Structure and Materials, College of Chemistry, Jilin University, Changchun 130012, P. R. China. E-mail: yuliu@jlu.edu.cn

<sup>b</sup>Institute of Functional Material Chemistry, Faculty of Chemistry, Northeast Normal University, Renmin Road 5268, Changchun, Jilin 130024, P. R. China

<sup>c</sup>Department of Chemistry, Durham University, Durham, DH1 3LE, UK. E-mail: m.r.bryce@durham.ac.uk

### Synthesis and Characterization Details:

Dfpypy and Medfpypy were synthesized by Suzuki coupling following the method reported by Lee et al.<sup>S1</sup> The iridium dimer complexes [(dfpypy)<sub>2</sub>Ir(μ-Cl)]<sub>2</sub> and [(Medfpypy)<sub>2</sub>Ir(μ-Cl)]<sub>2</sub> were synthesized using IrCl<sub>3</sub>·3H<sub>2</sub>O according to the standard literature method.<sup>S2</sup>

**Synthesis of Fptz** : Picolinonitrile (2.08 g, 20 mmol) and sodium methoxide (120 mg, 2 mmol) in ethanol (40 ml) were stirred at room temperature for 12 h, then NH<sub>4</sub>Cl (1.28 g) was added and the solution was refluxed with stirring for 5 h then cooled to room temperature. The precipitate was filtered and the filtrate was evaporated under reduced pressure and the residue dried in vacuum to give picolinimidamide hydrochloride (3.1 g). Ethyl trifluoroacetate (2.84 g, 20.0 mmol) and hydrazine hydrate (1.5 g, 80%, 24.0 mmol) in THF (12.0 mL) were refluxed for 1.5 h. After the solution had cooled to room temperature, picolinimidamide hydrochloride (3.1 g) and NaOH (0.8 g) were added, and the mixture was refluxed for 5 h. The mixture was cooled to room temperature, the precipitate was filtered and the filtrate was evaporated under reduced pressure to give a crude residue which was purified by column chromatography on silica gel (eluent EtOAc-hexane, 1:5 v/v) to obtain **Fptz** as a canary yellow solid (3.59 g, yield 84%). Characterization data were in agreement with those in the literature.<sup>S3</sup>

**Synthesis of Ir(dfpypy)<sub>2</sub>(Fptz) (Ir1)**: Fptz (0.86 g, 4.0 mmol) and tetrabutylammonium hydroxide (TBAOH: 1.6 g, 50%, 3.0 mmol) were dissolved in dichloromethane (60 mL). The

mixture was refluxed for 30 min and the solution was cooled to room temperature, then  $[(dfppy)_2Ir(\mu-Cl)]_2$ <sup>S3,S4</sup> (1.25 g, 1.0 mmol) was added. The solution was stirred for 8 h at 30 °C and then cooled to room temperature. The mixture was quenched with water, and the organic phase was extracted with dichloromethane. After drying over Na<sub>2</sub>SO<sub>4</sub>, the dichloromethane solution was concentrated and the residue was purified by column chromatography on Al<sub>2</sub>O<sub>3</sub> gel (eluent tetrahydrofuran-chloroform = 5:1 v/v) to give **Ir1** as a yellow powder, (1.18 g, 75%). <sup>1</sup>H NMR (500 MHz, CDCl<sub>3</sub>)  $\delta$  8.63 (d,  $J$  = 7.6 Hz, 1H), 8.35 (dd,  $J$  = 17.3, 8.3 Hz, 2H), 8.06 (t,  $J$  = 7.8 Hz, 1H), 7.92 (dd,  $J$  = 13.8, 7.2 Hz, 2H), 7.81 (d,  $J$  = 5.2 Hz, 1H), 7.76 (d,  $J$  = 6.0 Hz, 1H), 7.48 (d,  $J$  = 5.4 Hz, 1H), 7.42–7.36 (m, 1H), 7.20 (t,  $J$  = 6.6 Hz, 1H), 7.09 (dd,  $J$  = 12.5, 6.2 Hz, 1H), 5.80 (s, 1H), 5.67 (s, 1H). Elemental analysis: found C, 42.93%; H, 1.80%; N, 14.23%; calc. for C<sub>28</sub>H<sub>14</sub>F<sub>7</sub>IrN<sub>8</sub>: C, 42.70%; H, 1.79%; N, 14.23%. MS m/z: 787.8 [M<sup>+</sup>] (calcd: 788.1).

**Synthesis of Ir(Medfppy)<sub>2</sub>(Fptz) (Ir2):** The complex was prepared by the same method as described for **Ir1**, using  $[(Medfppy)_2Ir(\mu-Cl)]_2$ <sup>S3</sup> (1.28 g, 2.0 mmol), Fptz (0.86 g, 4.0 mmol) and TBAOH (1.6 g, 50%, 3 mmol), and isolated as a yellow powder (1.15 g, 71%). <sup>1</sup>H NMR (500 MHz, CDCl<sub>3</sub>)  $\delta$  8.36 (d,  $J$  = 7.9 Hz, 1H), 8.10 (d,  $J$  = 18.7 Hz, 2H), 7.98 (td,  $J$  = 7.9, 1.2 Hz, 1H), 7.75 (d,  $J$  = 5.2 Hz, 1H), 7.54 (d,  $J$  = 6.0 Hz, 1H), 7.32–7.27 (m, 2H), 6.95 (d,  $J$  = 5.4 Hz, 1H), 6.86 (d,  $J$  = 5.5 Hz, 1H), 5.80 (s, 1H), 5.67 (s, 1H), 2.56 (s, 6H). Elemental analysis: found C, 44.36%; H, 2.20%; N, 13.70%; calc. for C<sub>30</sub>H<sub>18</sub>F<sub>7</sub>IrN<sub>8</sub>: C, 44.17%; H, 2.22%; N, 13.74%. MS m/z: 815.6 [M<sup>+</sup>] (calcd: 815.7).

### **Theoretical Calculations:**

The ground state geometries were fully optimized by the density functional theory (DFT)<sup>S5</sup> method with the Becke three-parameter hybrid exchange and the Lee-Yang-Parr correlation functional<sup>S6</sup> (B3LYP) and 6-31G\*\* basis set using the Gaussian 03 software package.<sup>S7</sup>

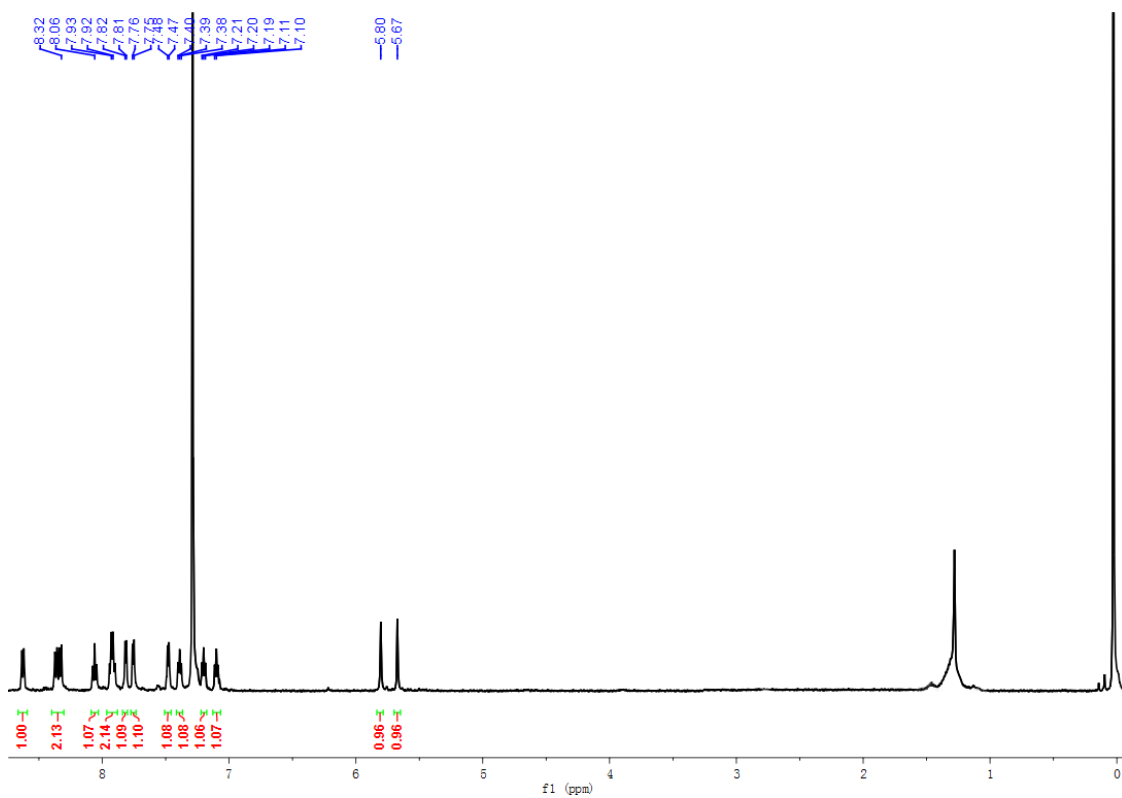

**Figure S1.**  $^1\text{H}$  NMR spectrum of **Ir1** in  $\text{CDCl}_3$ .

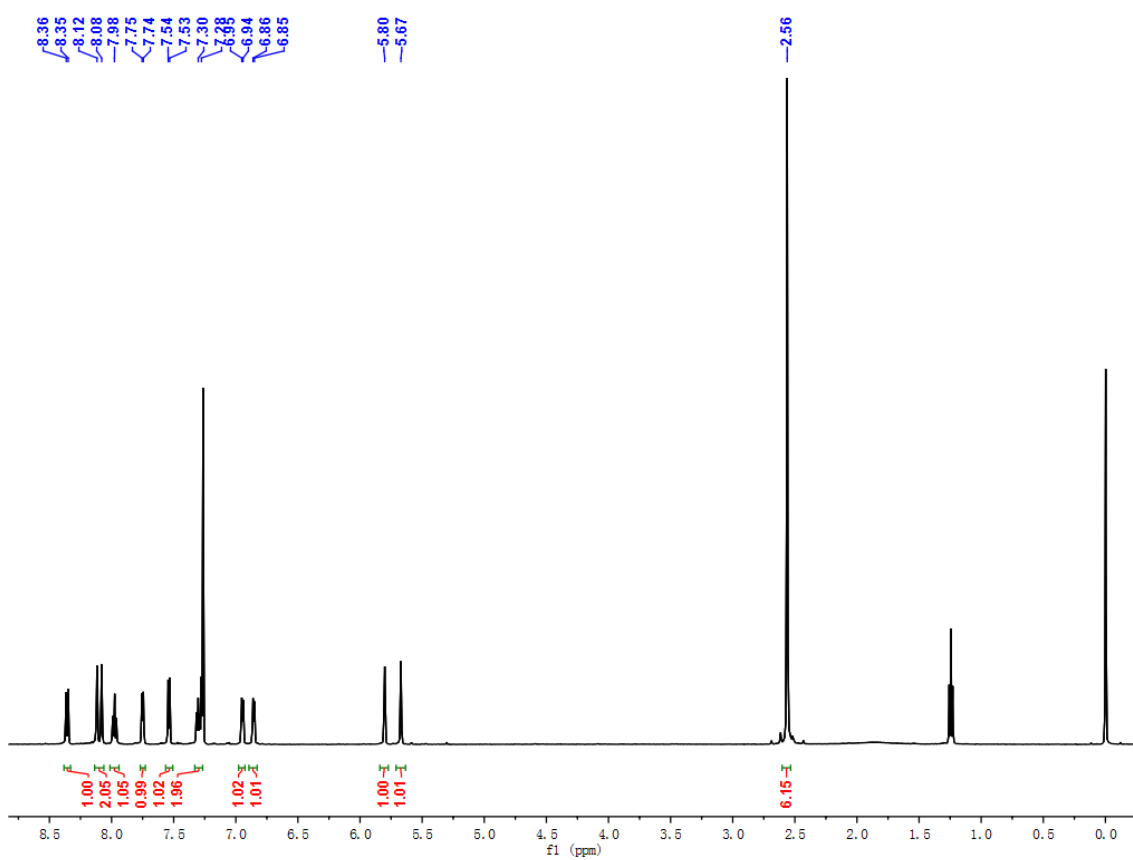

**Figure S2.**  $^1\text{H}$  NMR spectrum of **Ir2** in  $\text{CDCl}_3$ .

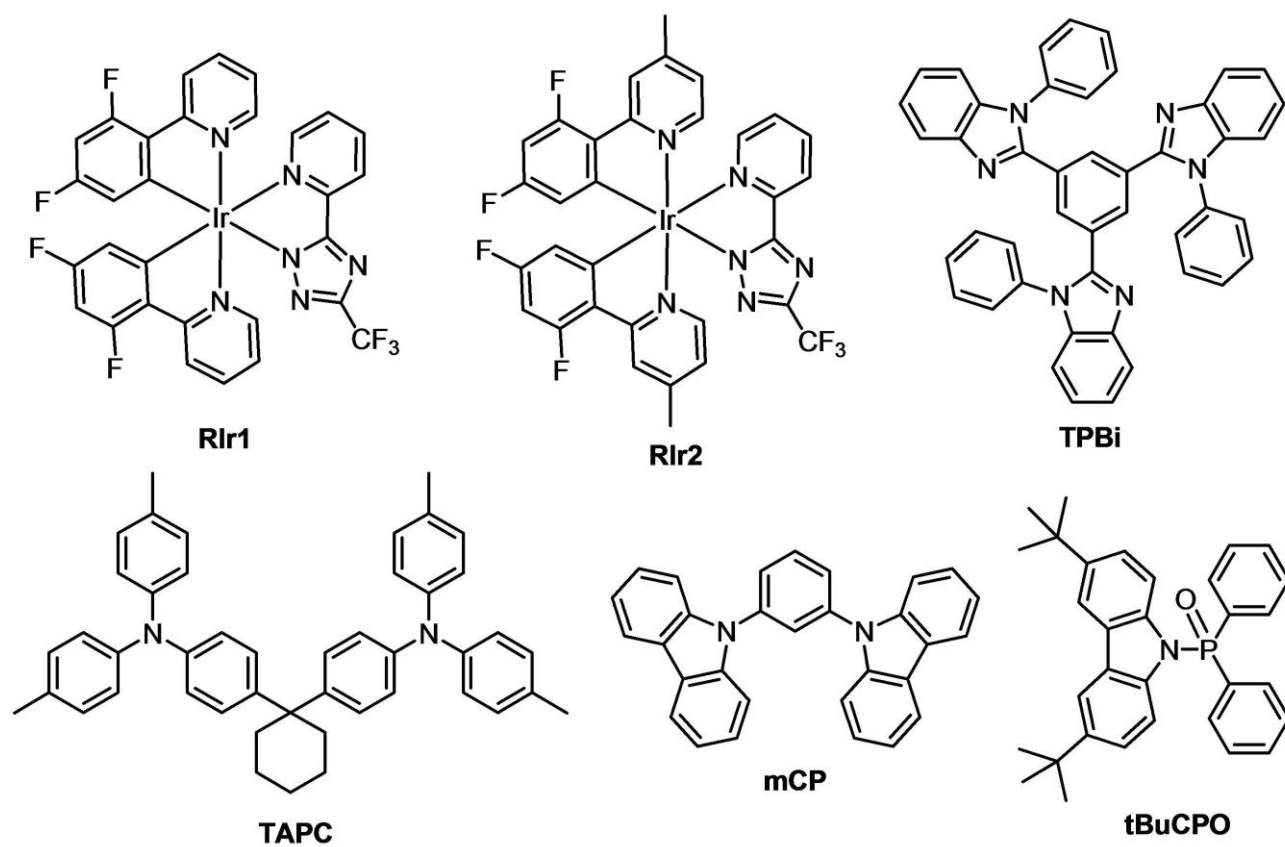

**Figure S3.** Chemical formulae of the reference complexes (RIr1 and RIr2) studied for comparison with Ir1 and Ir2, and the materials used in device preparation.

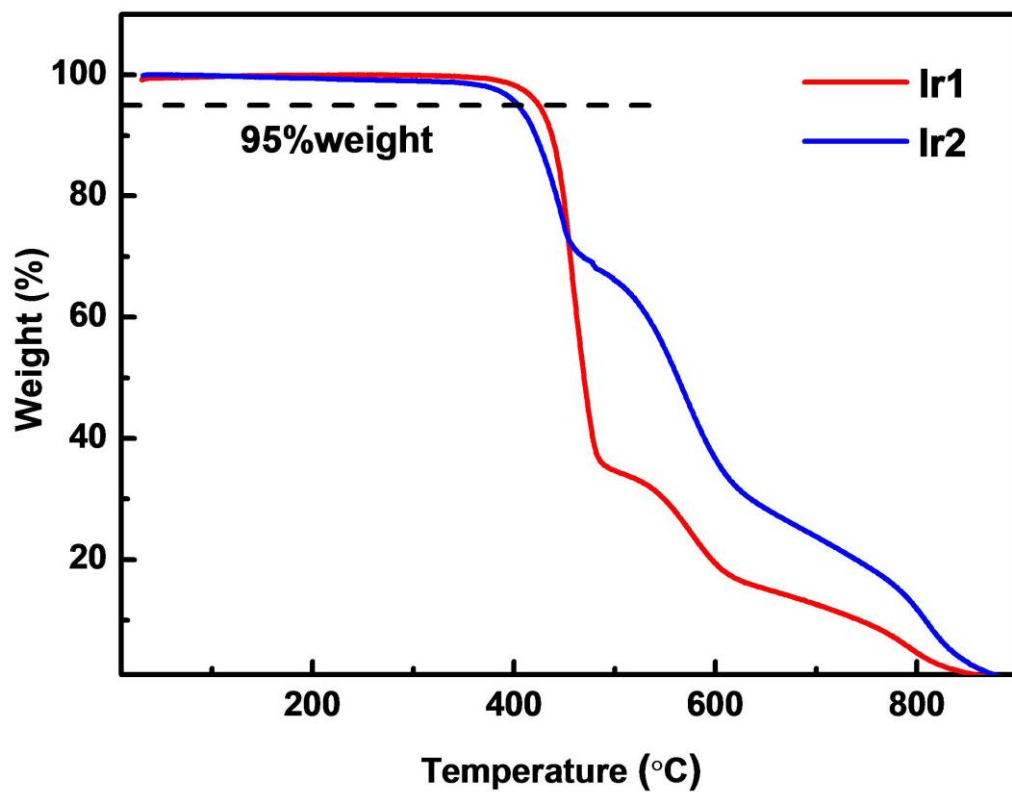

Figure S4. TGA graphs of Ir1 and Ir2.

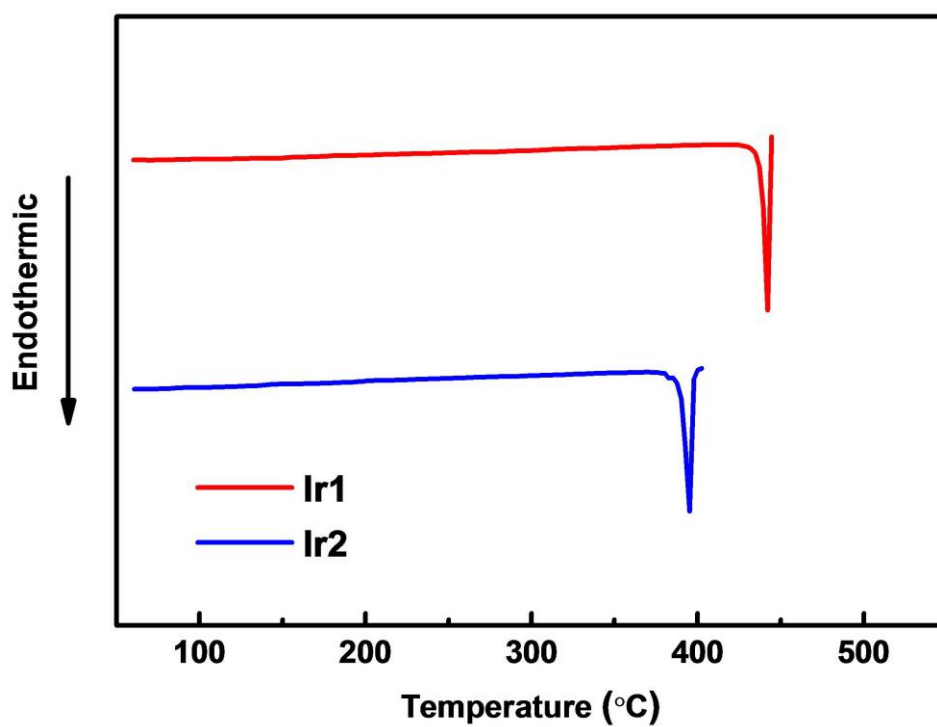

Figure S5. DSC graphs of Ir1 and Ir2.

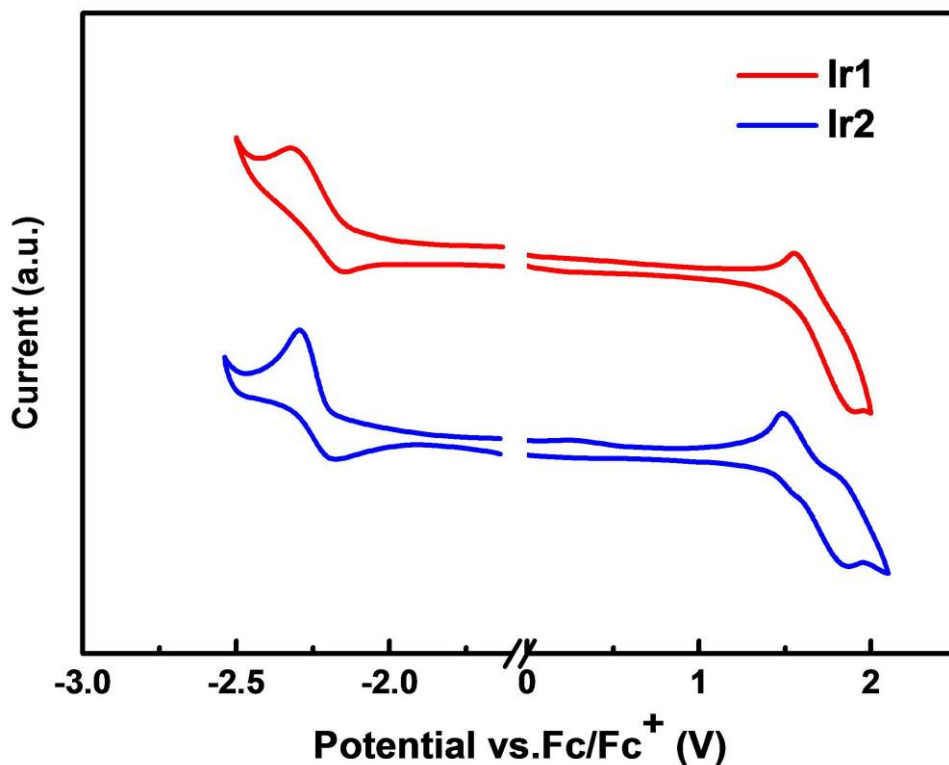

**Figure S6.** Cyclic voltammograms of complexes **Ir1** and **Ir2** recorded in dichloromethane for oxidation and in acetonitrile for reduction.

### Single Crystal X-ray Structures:

Single crystals suitable for X-ray structural analysis were obtained by vacuum sublimation. Diffraction data were collected on a Rigaku RAXIS-PRID diffractometer using the  $\omega$ -scan mode with graphite-monochromator Mo K $\alpha$  radiation. The structures were solved by direct methods using the SHELXTL programs and refined with full-matrix least-squares on  $F^2$ .<sup>S8</sup> Non-hydrogen atoms were refined anisotropically. The positions of hydrogen atoms were calculated and refined isotropically. The corresponding CCDC reference numbers are 1052634 for **Ir1** and 1052689 for **Ir2**: the data can be obtained free of charge from The Cambridge Crystallographic Data Centre via [www.ccdc.cam.ac.uk/data\\_request/cif](http://www.ccdc.cam.ac.uk/data_request/cif).

**Table S1.** Crystal data and structure refinement parameters for complexes **Ir1** and **Ir2**.

| Complexes        | <b>Ir1</b>                                                      | <b>Ir2</b>                                                      |
|------------------|-----------------------------------------------------------------|-----------------------------------------------------------------|
| Formula          | C <sub>28</sub> H <sub>14</sub> F <sub>7</sub> IrN <sub>8</sub> | C <sub>30</sub> H <sub>18</sub> F <sub>7</sub> IrN <sub>8</sub> |
| molecular weight | 788.1                                                           | 815.72                                                          |

|                                                  |                |                     |
|--------------------------------------------------|----------------|---------------------|
| crystal system                                   | Monoclinic     | Monoclinic          |
| space group                                      | C 2/c          | P 2 <sub>1</sub> /n |
| crystal size [mm <sup>3</sup> ]                  | 0.38×0.34×0.31 | 0.21×0.20×0.18      |
| a [Å]                                            | 32.451(7)      | 10.423(2)           |
| b [Å]                                            | 10.272(2)      | 16.123(3)           |
| c [Å]                                            | 15.874(3)      | 17.439(4)           |
| α[o]                                             | 90.00          | 90.00               |
| β[o]                                             | 92.58(3)       | 96.28(3)            |
| γ[o]                                             | 90.00          | 90.00               |
| V [Å <sup>3</sup> ]                              | 5286.0(19)     | 2913.1(10)          |
| Z                                                | 8              | 4                   |
| ρ <sub>calc</sub> [g/cm <sup>3</sup> ]           | 1.980          | 1.860               |
| temp (K)                                         | 293(2)         | 293(2)              |
| μ [mm <sup>-1</sup> ]                            | 5.138          | 4.665               |
| reflections collected                            | 24901          | 26687               |
| independent reflections                          | 6023           | 6602                |
| RF, R <sub>w</sub> (F <sup>2</sup> ) (all data)  | 0.0381, 0.0689 | 0.0560, 0.0719      |
| RF, R <sub>w</sub> (F <sup>2</sup> ) [I > 2σ(I)] | 0.0256, 0.0566 | 0.0361, 0.0665      |
| GOF                                              | 1.068          | 1.072               |
| CCDC                                             | 1052634        | 1052689             |

$$R_F = \Sigma ||F_o - F_c| / \Sigma |F_o|. R_w(F^2) = [\Sigma w|F_o^2 - F_c^2|^2 / \Sigma w(F_o^4)]^{1/2}$$

**Table S2.** Selected bond lengths (Å) and angles (deg) of **Ir1** and **Ir2**.

| <b>Ir1</b>       |          | <b>Ir2</b>       |           |
|------------------|----------|------------------|-----------|
| bond lengths (Å) |          | bond lengths (Å) |           |
| Ir(1)-C(10)      | 2.009(4) | Ir(1)-C(10)      | 2.005(4)  |
| Ir(1)-C(20)      | 2.008(4) | Ir(1)-C(21)      | 1.981(4)Å |
| Ir(1)-N(1)       | 2.051(3) | Ir(1)-N(1)       | 2.040(4)  |

|                  |            |                  |            |
|------------------|------------|------------------|------------|
| Ir(1)-N(3)       | 2.055(3)   | Ir(1)-N(3)       | 2.055(4)   |
| Ir(1)-N(5)       | 2.170(3)   | Ir(1)-N(5)       | 2.169(4)   |
| Ir(1)-N(6)       | 2.119(3)   | Ir(1)-N(6)       | 2.101(3)   |
| angles (deg)     |            | angles (deg)     |            |
| C(10)-Ir(1)-N(1) | 80.27(14)  | C(10)-Ir(1)-N(1) | 80.23(18)  |
| C(20)-Ir(1)-N(3) | 80.08(14)  | C(21)-Ir(1)-N(3) | 80.00(17)  |
| N(6)-Ir(1)-N(5)  | 76.36(12)  | N(6)-Ir(1)-N(5)  | 75.99(14)  |
| C(10)-Ir(1)-N(6) | 170.57(13) | C(10)-Ir(1)-N(6) | 171.28(17) |
| C(20)-Ir(1)-N(5) | 176.60(13) | C(21)-Ir(1)-N(5) | 176.10(15) |
| N(3)-Ir(1)-N(5)  | 96.95(12)  | N(3)-Ir(1)-N(5)  | 97.27(16)  |

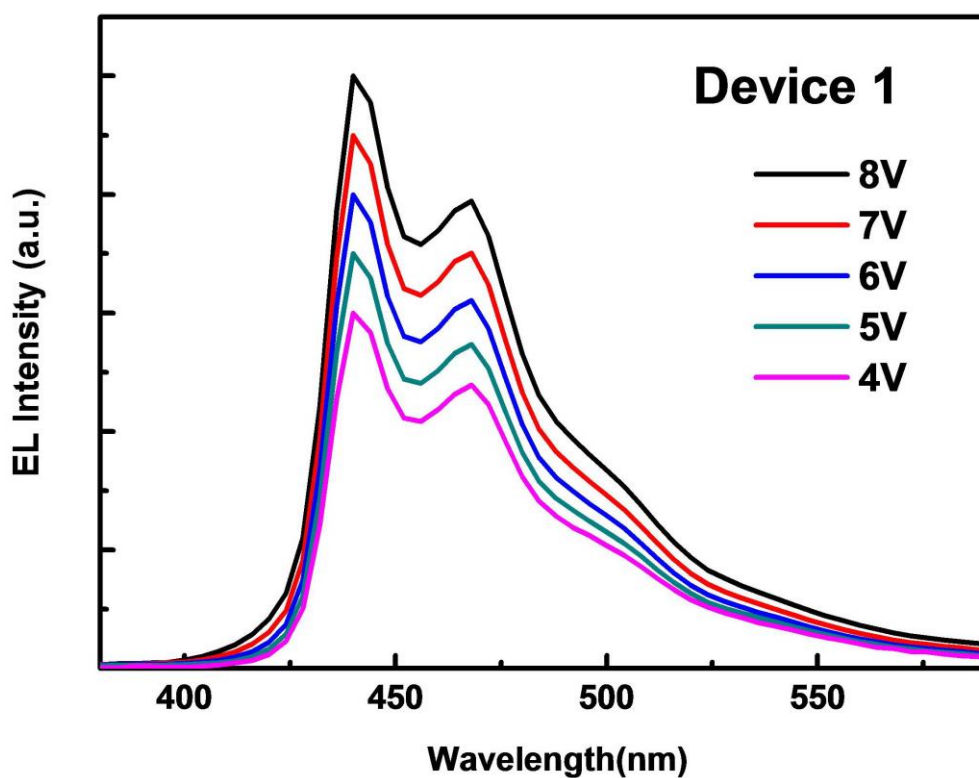

**Figure S7.** EL spectra of Device 1 based on Ir1 at different driving voltages.



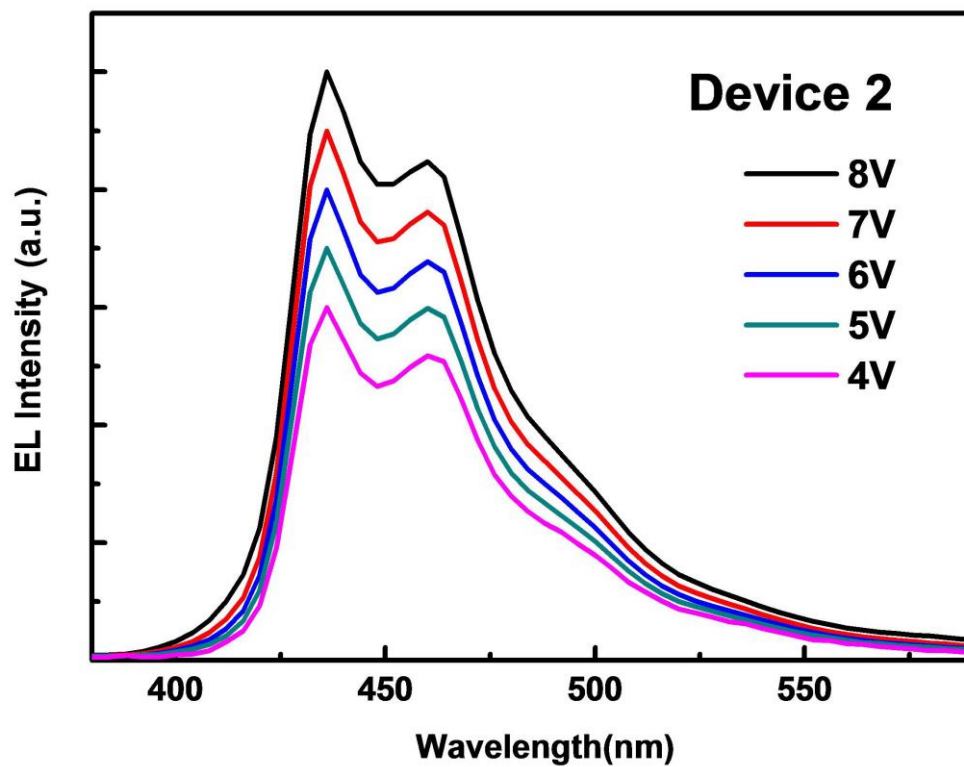

Figure S8. EL spectra of Device 2 based on Ir2 at different driving voltages.

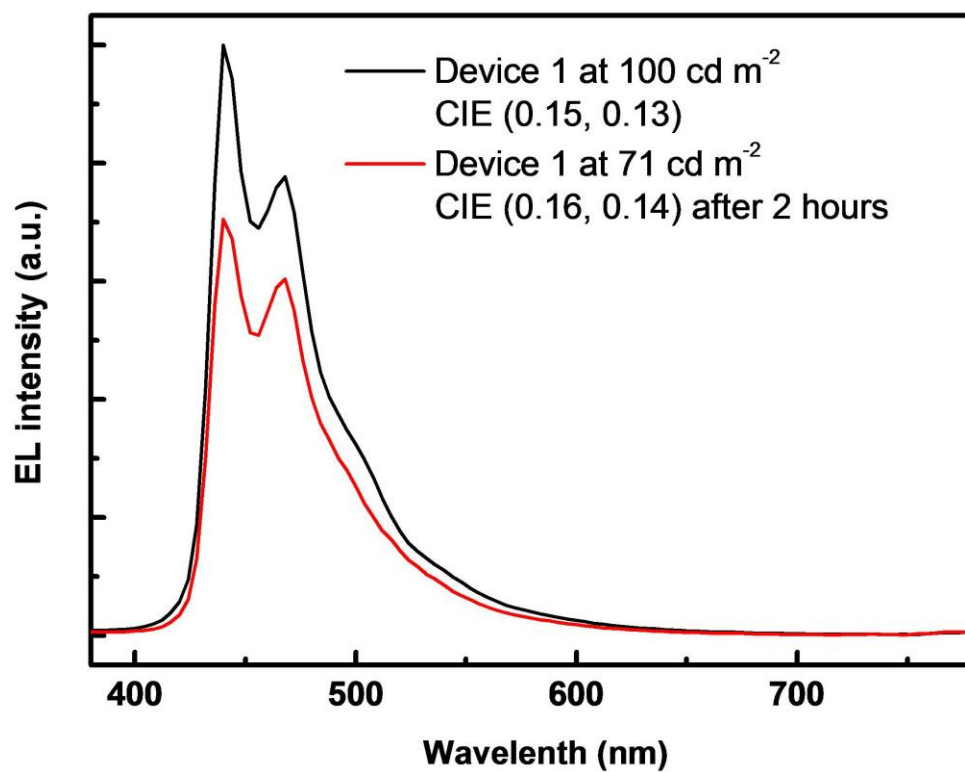

Figure S9. EL spectra of Device 1 based on Ir1 at  $100 \text{ cd m}^{-2}$  before and after continuous operation for 2 hours.

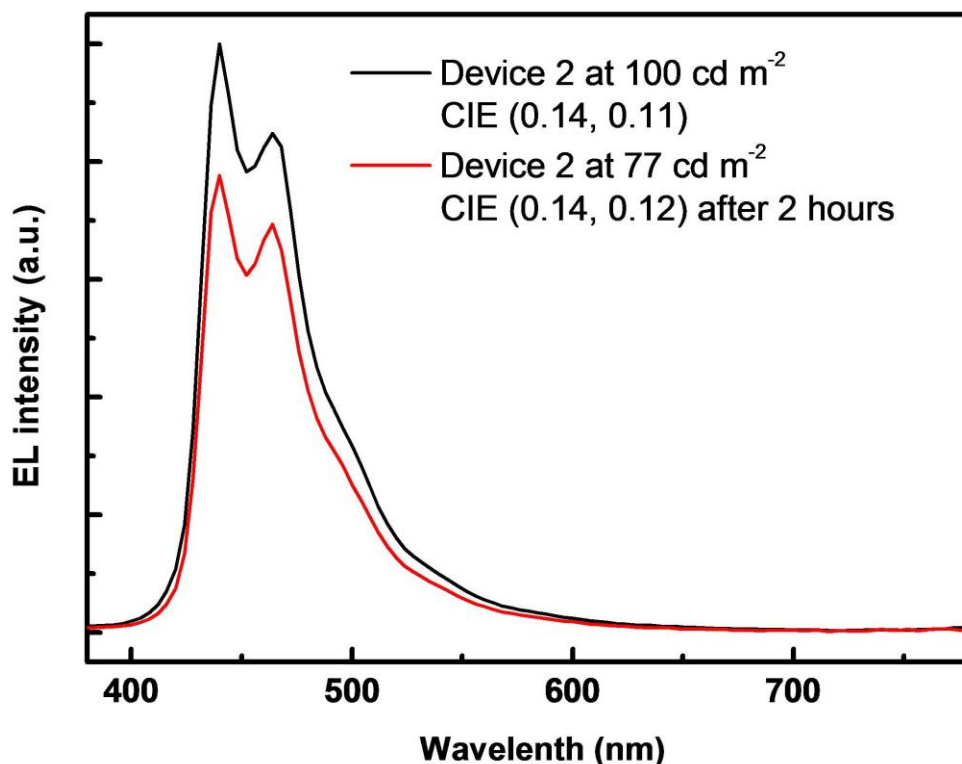

**Figure S10.** EL spectra of Device 2 based on Ir2 at  $100 \text{ cd m}^{-2}$  before and after continuous operation for 2 hours.

#### References for the Supporting Information :

- S1 S. J. Lee, K.-M. Park, K. Yang and Y. Kang, *Inorg. Chem.*, 2009, **48**, 1030.
- S2 M. Nonoyama, *Bull. Chem. Soc. Jpn.*, 1974, **47**, 767.
- S3 H. J. Park, J. N. Kim, H.-J. Yoo, K.-R. Wee, S. O. Kang, D. W. Cho and U. C. Yoon, *J. Org. Chem.*, 2013, **78**, 8054.
- S4 H. Oh, K.-M. Park, H. Hwang, S. Oh, J. H. Lee, J.-S. Lu, S. Wang and Y. Kang, *Organometallics*, 2013, **32**, 6427.
- S5 E. Runge and E. K. U. Gross, *Phys. Rev. Lett.*, 1984, **52**, 997.
- S6 A. D. Becke, *J. Chem. Phys.*, 1993, **98**, 5648.
- S7 M. J. Frisch, G. W. Trucks, H. B. Schlegel, G. E. Scuseria, M. A. Robb, J. R. Cheeseman, J. A. Montgomery, Jr., T. Vreven, K. N. Kudin, J. C. Burant, J. M. Millam, S. S. Iyengar, J. Tomasi, V. Barone, B. Mennucci, M. Cossi, G. Scalmani, N. Rega, G. A. Petersson, H. Nakatsuji, M. Hada, M. Ehara, K. Toyota, R. Fukuda, J. Hasegawa, M. Ishida, T. Nakajima, Y. Honda, O. Kitao, H. Nakai, M. Klene, X. Li, J. E. Knox, H. P. Hratchian, J. B. Cross, C. Adamo, J. Jaramillo, R. Gomperts, R. E. Stratmann, O. Yazyev, A. J. Austin, R. Cammi, C. Pomelli, J. W. Ochterski, P. Y. Ayala, K. Morokuma, G. A. Voth, P. Salvador, J. J. Dannenberg, V. G. Zakrzewski, S. Dapprich, A. D. Daniels, M. C. Strain, O. Farkas, D. K. Malick, A. D. Rabuck, K. Raghavachari, J. B. Foresman, J. V. Ortiz, Q. Cui, A. G. Baboul, S. Clifford, J. Cioslowski, B. B. Stefanov, G. Liu, A. Liashenko, P. Piskorz, I. Komaromi, R. L. Martin, D. J. Fox, T. Keith, M. A. Al-Laham, C. Y. Peng, A.

Nanayakkara, M. Challacombe, P. M. W. Gill, B. Johnson, W. Chen, M. W. Wong, C. Gonzalez, J. A. Pople, *Gaussian 03, Revision C.02*, Gaussian, Inc.: Pittsburgh, PA 2003.

S8 (a) SHELXTL, Version 5.1; Siemens Industrial Automation, Inc., 1997. (b) G. M. Sheldrick, SHELXS-97, Program for Crystal Structure Solution, University of Göttingen, Göttingen, 1997.
